# Supplementary material
Source: ML conference proceedings conference paper supplement (https://aclanthology.org/2021.semeval-1.126)

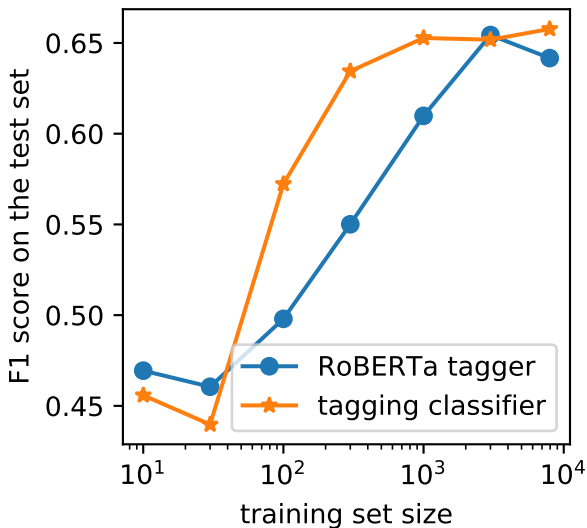

Supplement: OptionalSupplementaryMaterial [file 2021.semeval-1.126.OptionalSupplementaryMaterial.zip]

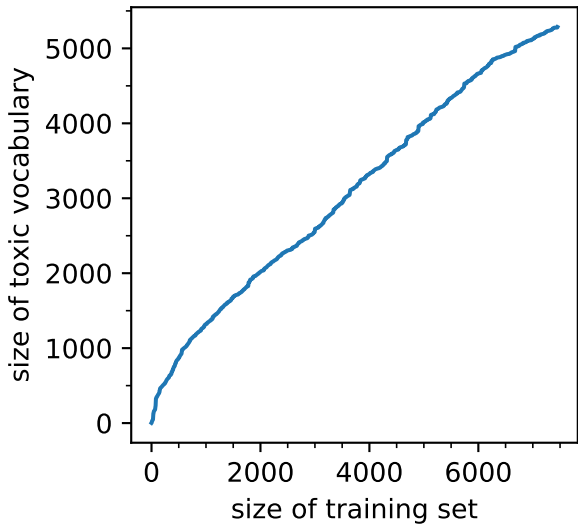

Supplement: OptionalSupplementaryMaterial [file 2021.semeval-1.126.OptionalSupplementaryMaterial.zip]
